# Supplementary material for: Alternaria muriformis sp. nov., a New Species in Section Chalastospora Isolated from Herbivore Dung in Spain
Source: MDPI journal article supplement (doi:10.3390/d15050606), 2023-04-28
Supplement: s1 [file s1]

Archive with 1 entries (1 files):
- diversity-2338441-supplementary.pdf
