# Supplementary material for: Alternaria muriformis sp. nov., a New Species in Section Chalastospora Isolated from Herbivore Dung in Spain
Source: MDPI journal article supplement (doi:10.3390/d15050606), 2023-04-28
Supplement: s1 [file s1 › diversity-2338441-supplementary.pdf]

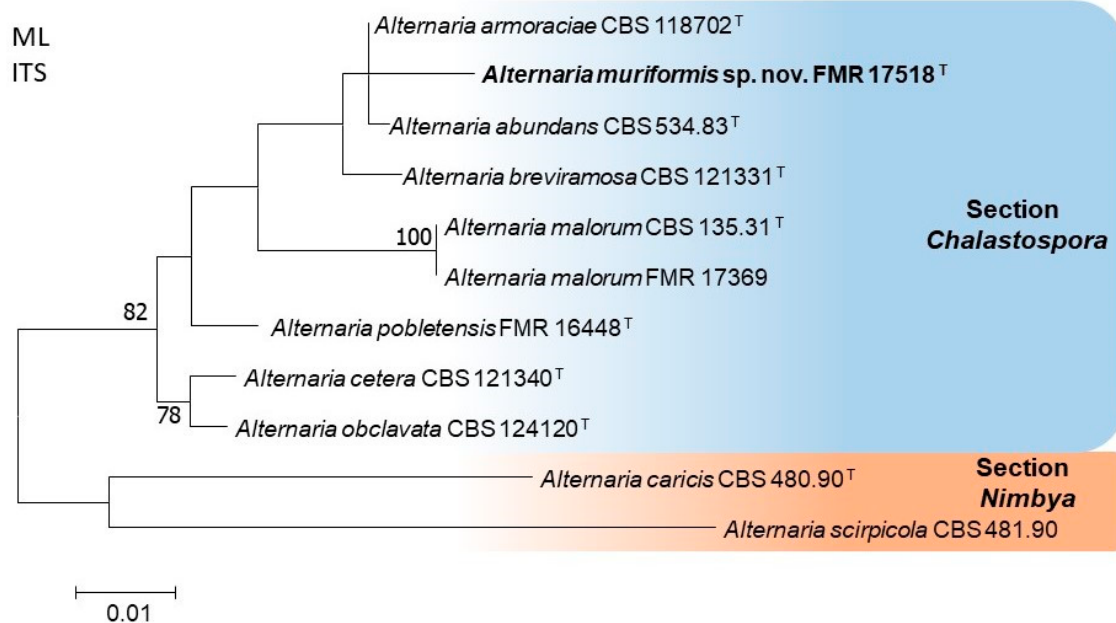

**Figure S1.** Maximum Likelihood tree of the section *Chalastospora* constructed with ITS region.

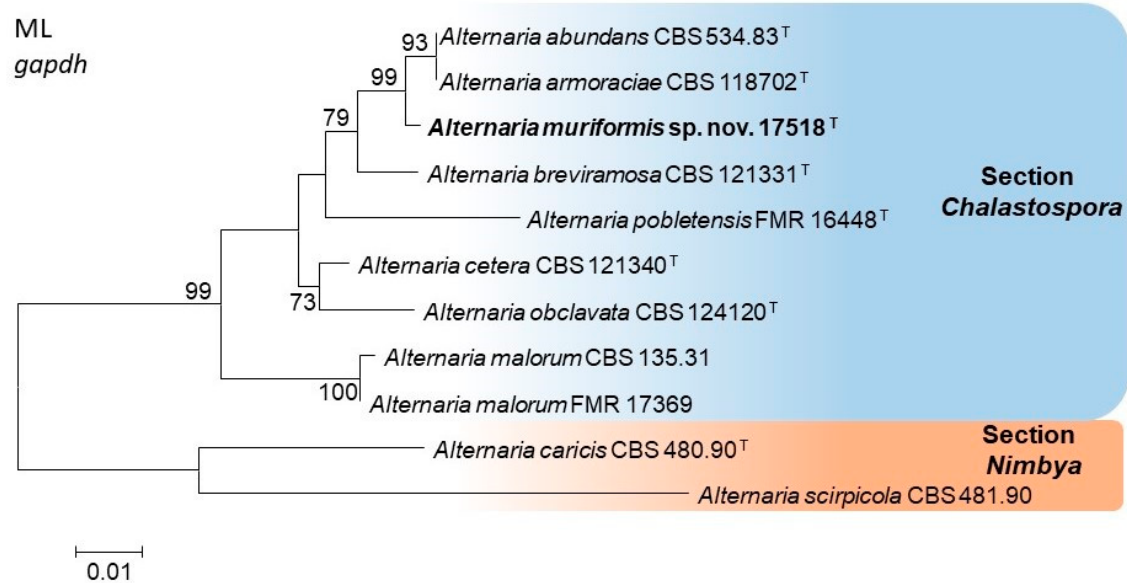

**Figure S2.** Maximum Likelihood tree of the section *Chalastospora* constructed with *gapdh*.

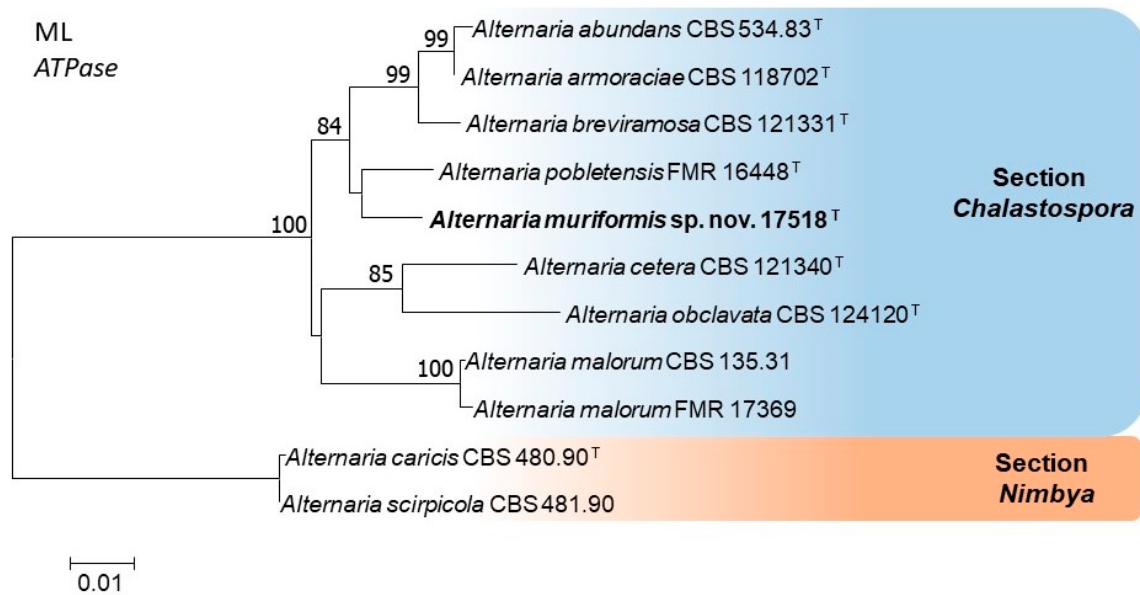

**Figure S3.** Maximum Likelihood tree of the section *Chalastospora* constructed with *ATPase*.
